# Supplementary material
Source: PubMed Central journal article supplement (PMC3423795)
Supplement: Supp_Fig1.pdf [file Supp_Fig1.pdf]

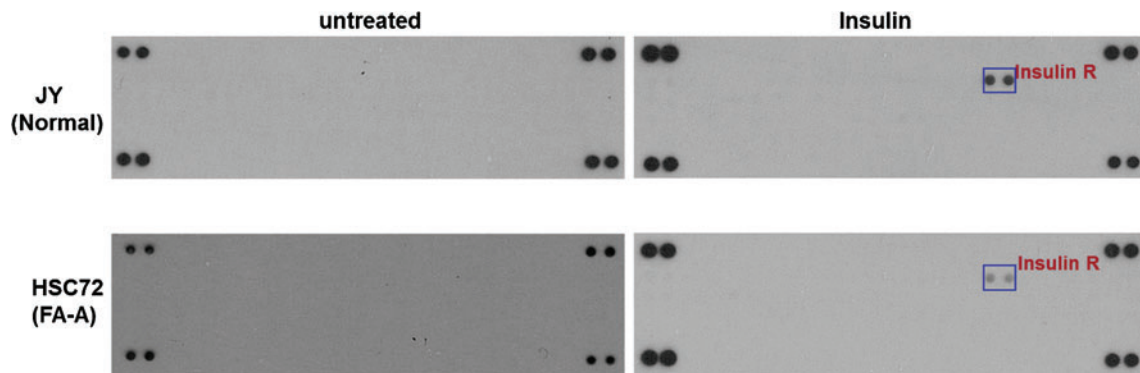

**SUPPLEMENTARY FIG. S1. Decreased IR phosphorylation in FA-A cells.** Normal human JY lymphoblasts or human *FANCA*-deficient HSC72 cells were starved overnight and treated with or without insulin (10  $\mu\text{g}/\text{ml}$ ) for 15 min. WCEs were used to perform human receptor tyrosine kinases array, and the phosphorylation of RTKs was determined by the HRP-linked anti-phospho-tyrosine antibody. FA, Fanconi anemia; *FANCA*, Fanconi anemia complementation group A; IR, insulin receptor; RTK, receptor tyrosine kinase; WCEs, whole cell extracts.
