# Supplementary material
Source: PubMed Central journal article supplement (PMC3423795)
Supplement: Supp_Fig2.pdf [file Supp_Fig2.pdf]

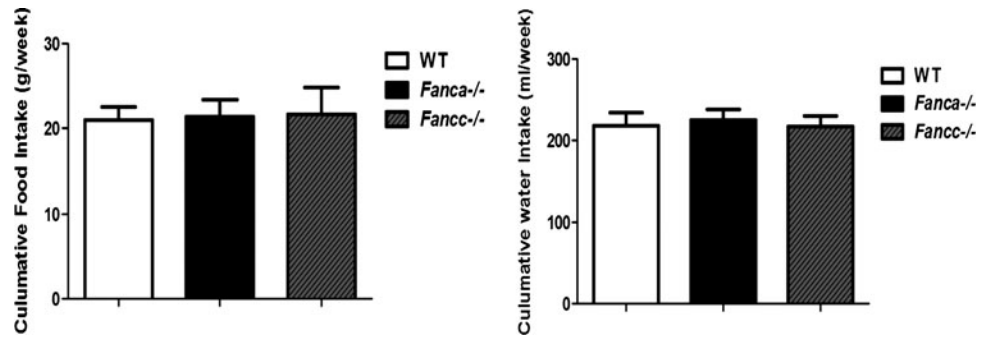

**SUPPLEMENTARY FIG. S2. Food/water intake in mice.** *Fanca*<sup>-/-</sup> or *Fancc*<sup>-/-</sup> mice and their wt littermates (6–8 weeks old) were divided into three to four mice per cage, and cumulative food (*left*) or water (*right*) intake was measured as described in Experimental procedures. Values are expressed as means±SD. FANCC, Fanconi anemia complementation group C; WT, wild-type.
