# Supplementary material
Source: PubMed Central journal article supplement (PMC3423795)
Supplement: Supp_Fig3.pdf [file Supp_Fig3.pdf]

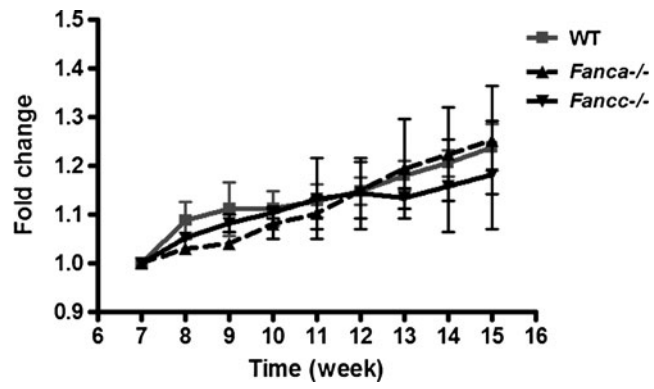

SUPPLEMENTARY FIG. S3. Body weight gain in wt or *Fanca*<sup>-/-</sup> or *Fancx*<sup>-/-</sup> with normal chow. The mice were continuously fed with the normal diet for approximately 3 months. Body weight was measured once a week and shown as the fold of change compared with the body weight at the beginning of the experiment.
