# Supplementary material
Source: PubMed Central journal article supplement (PMC3423795)
Supplement: Supp_Fig4.pdf [file Supp_Fig4.pdf]

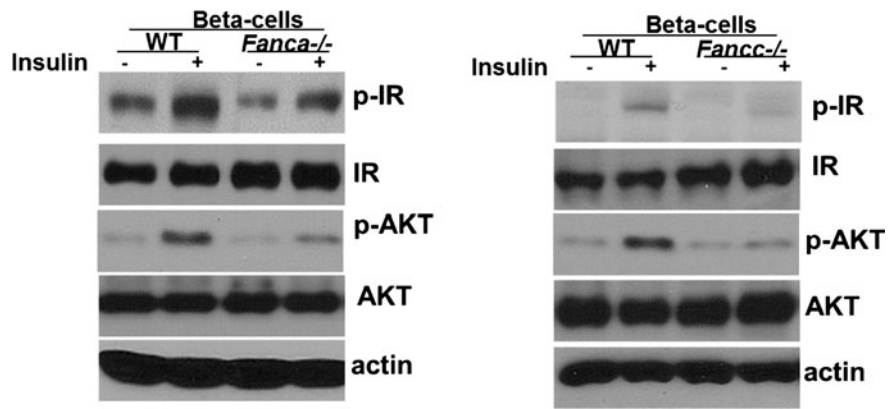

**SUPPLEMENTARY FIG. S4. Impaired insulin signaling in the beta cells isolated from *Fanca*<sup>-/-</sup> or *Fancc*<sup>-/-</sup> mice compared with the cells from WT littermates.** Primary beta cells were treated with saline or insulin (10  $\mu$ g/ml) for 15 min, and the phosphorylation of IR and AKT was examined by immunoblotting. Total IR, AKT, and actin were probed as loading controls.
