# Supplementary material
Source: PubMed Central journal article supplement (PMC3423795)
Supplement: Supp_Fig5.pdf [file Supp_Fig5.pdf]

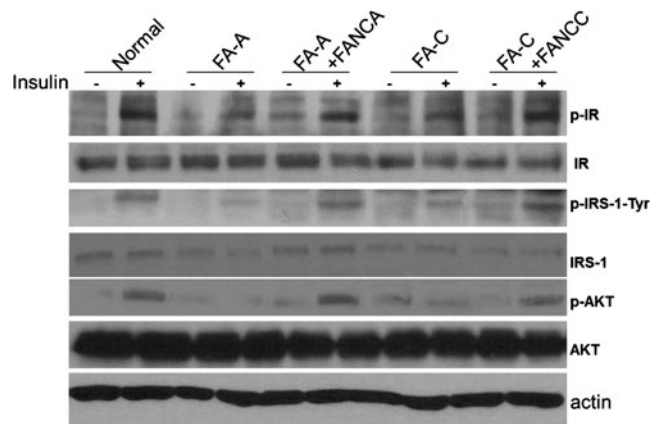

**SUPPLEMENTARY FIG. S5. Functional correction of FA-A or FA-C restored decreased IR phosphorylation in FA cells.** The indicated cells were treated with insulin at  $10 \mu\text{g}/\text{ml}$  for 15 min. Cell lysates were analyzed by immunoprecipitation and immunoblotting to examine the status of IR, IRS-1, and AKT. Actin was probed as a loading control. IRS, insulin receptor substrate.
