# Supplementary material
Source: PubMed Central journal article supplement (PMC3423795)
Supplement: Supp_Fig6.pdf [file Supp_Fig6.pdf]

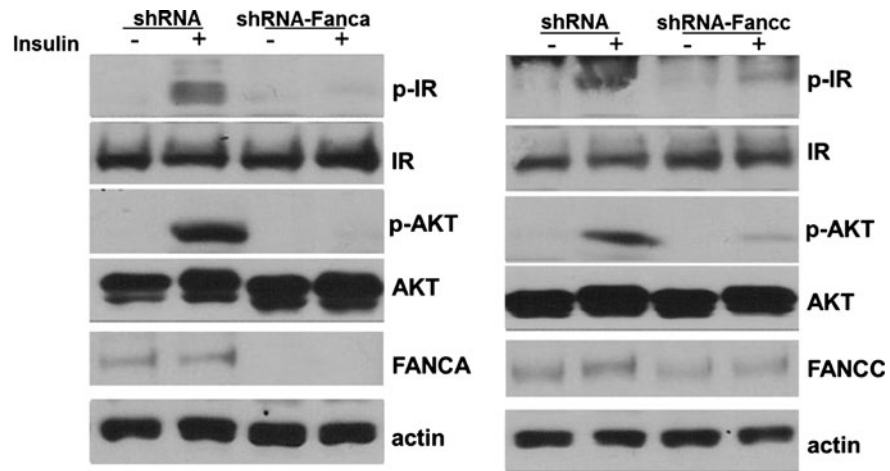

**SUPPLEMENTARY FIG. S6. Decreased IR Tyr phosphorylation in FANCA or FANCC knockdown cells.** Adipocytes 3T3-L1 transduced with the lentivirus carrying control or shRNA for Fanca or Fancc were starved overnight and treated with insulin (10  $\mu$ g/ml) for 15 min. WCEs were separated with SDS-PAGE and probed with the indicated antibodies. SDS-PAGE, sodium dodecyl sulfate polyacrylamide gel electrophoresis.
